# Supplementary material
Source: publisher figshare collection journal article supplement (https://asha.figshare.com/articles/dataset/_/16840459)
Supplement: Supplementary file 1 [file 1]

**Supplemental Material S4. Post-Intervention Student Survey.**

1. The information that I learned for the play therapy component of the training was:  

|      |         |      |           |
|------|---------|------|-----------|
| Poor | Average | Good | Excellent |
|------|---------|------|-----------|
2. The information that I learned for language intervention component of the training was:  

|      |         |      |           |
|------|---------|------|-----------|
| Poor | Average | Good | Excellent |
|------|---------|------|-----------|
3. What was this training experience like for you?
4. The training could have been made better by:
5. What are your thoughts on utilizing this intervention with this specific population?
6. How do you think this intervention could be improved?
7. Has this experience of learning and using psychology approaches helped you to understand the value of the interprofessional nature of our profession? Explain.
8. Any additional comments about the training, intervention, or other?
