# Supplementary material
Source: publisher figshare collection journal article supplement (https://asha.figshare.com/articles/dataset/_/16840459)
Supplement: Supplementary file 2 [file 1]

### **Supplemental Material S3. Parent Post-Intervention Survey 2.**

Child ID \_\_\_\_\_ Date: \_\_\_\_\_

#### Communication:

Have you noticed any changes in your child's communication skills since s/he was enrolled in this short-term intervention? ☐ Yes ☐ No

If Yes, please describe:

#### Behavior:

Have you noticed any changes in your child's behavior skills since s/he was enrolled in this short-term intervention? ☐ Yes ☐ No

If Yes, please describe:
