# Supplementary material
Source: publisher figshare collection journal article supplement (https://asha.figshare.com/articles/dataset/_/16840459)
Supplement: Supplementary file 3 [file 1]

## Supplemental Material S2. Parent Post-Intervention Survey I.

Child ID \_\_\_\_\_ Date \_\_\_\_\_

| Question                                                                         | Disagree | Somewhat Disagree | No Change | Somewhat Agree | Agree |
|----------------------------------------------------------------------------------|----------|-------------------|-----------|----------------|-------|
| My child has fewer challenging behaviors.                                        |          |                   |           |                |       |
| My child is less frustrated.                                                     |          |                   |           |                |       |
| I am understanding what my child says better.                                    |          |                   |           |                |       |
| Others are understanding what my child says better than before the intervention. |          |                   |           |                |       |
| My child produces longer sentences.                                              |          |                   |           |                |       |
| My child produces more complex sentences.                                        |          |                   |           |                |       |
| My child produces fewer ungrammatical sentences.                                 |          |                   |           |                |       |
| Overall, I am satisfied with the results I've observed from the intervention.    |          |                   |           |                |       |
| I would do this intervention with my child again.                                |          |                   |           |                |       |
| I would be interested in learning the techniques used with my child              |          |                   |           |                |       |
| Open-Ended Question                                                              |          |                   |           |                |       |
| This intervention could be made better by...                                     |          |                   |           |                |       |
